# Supplementary material for: Hybrids of Mo2C nanoparticles anchored on graphene sheets as anode materials for high performance lithium-ion batteries
Source: Royal Society of Chemistry journal article supplement (doi:10.1039/c5ta03929k), 2015-01-01
Supplement: c5ta03929k1.pdf [file c5ta03929k1.pdf]

## Electronic Supplementary Information

### Hybrids of Mo<sub>2</sub>C nanoparticles anchored on graphene sheets as anode materials for high performance lithium-ion batteries

Beibei Wang<sup>a</sup>, Gang Wang<sup>b</sup>, Hui Wang<sup>a\*</sup>

*<sup>a</sup>Key Laboratory of Synthetic and Natural Functional Molecule Chemistry (Ministry of Education), College of Chemistry & Materials science, Northwest University, Xi'an 710069, PR China*

*<sup>b</sup>National Key Laboratory of Photoelectric Technology and Functional Materials (Culture Base), National Photoelectric Technology and Functional Materials & Application International Cooperation Base, Institute of Photonics & Photon-Technology, Northwest University, Xi'an 710069, PR China*

\*Corresponding author:

Tel.: +86 29 8836 3115

Fax: +86 29 8830 3798

E-mail address: huiwang@nwu.edu.cn (H. Wang)

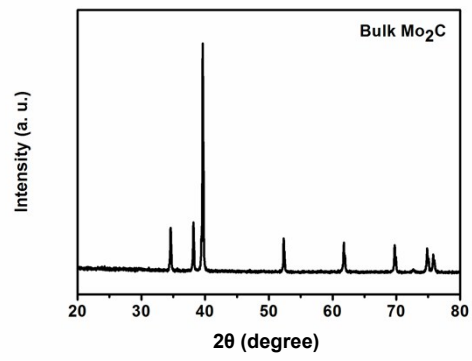

**Figure S1** XRD pattern of bulk Mo<sub>2</sub>C.

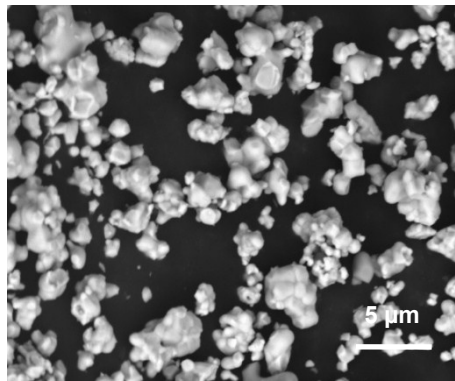

**Figure S2** SEM image of bulk Mo<sub>2</sub>C.

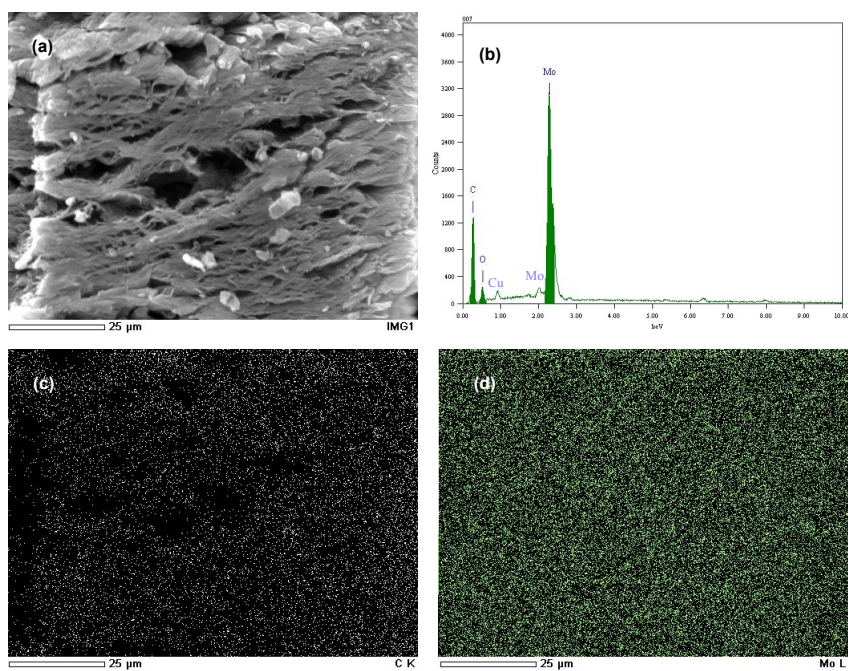

**Figure S3** (a) A low magnification SEM image of Mo<sub>2</sub>C(52.6%)/GR hybrid. (b) A typical EDS spectrum of Mo<sub>2</sub>C(52.6%)/GR hybrid. (c-d) C and Mo elemental mappings.

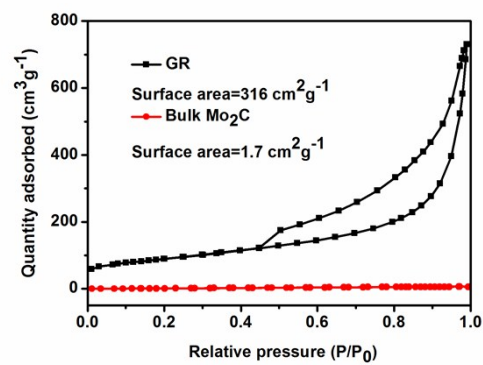

**Figure S4** Nitrogen adsorption/desorption isotherm of pure GR and bulk Mo<sub>2</sub>C.

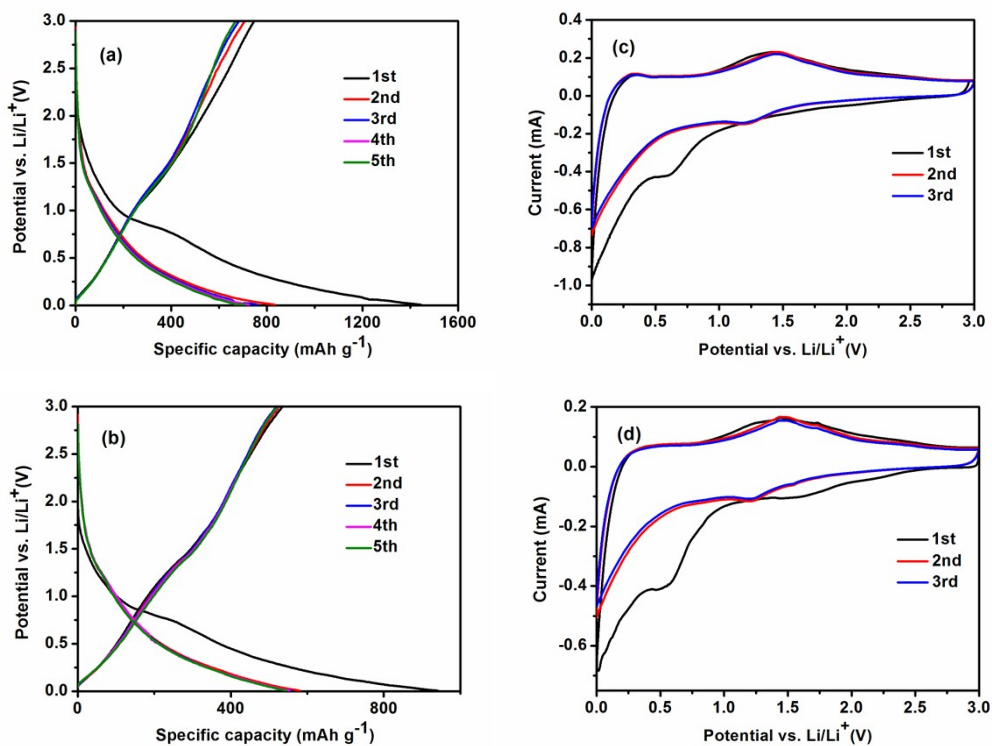

**Figure S5** Voltage profiles of (a) Mo<sub>2</sub>C(38.7%)/GR and (b) Mo<sub>2</sub>C(62.4%)/GR electrodes. CV curves of (c) Mo<sub>2</sub>C(38.7%)/GR and (d) Mo<sub>2</sub>C(62.4%)/GR electrodes at a scan rate of 0.1 mV s<sup>-1</sup> in the range of 0-3 V.

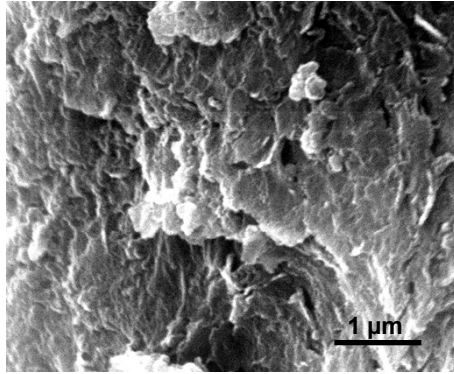

**Figure S6** SEM image of Mo<sub>2</sub>C(52.6%)/GR hybrid after 100 discharge/charge cycles at the current density of 100 mA g<sup>-1</sup>.
